# Supplementary material for: Amino acid transporter expansions associated with the evolution of obligate endosymbiosis in sap-feeding insects (Hemiptera: sternorrhyncha)
Source: PubMed Central journal article supplement (PMC4374396; doi:10.1186/s12862-015-0315-3), 2015-03-25
Supplement: 12862_2015_315_MOESM1_ESM.pdf [file 12862_2015_315_MOESM1_ESM.pdf]

1 **Additional file 1**

2

3 *Tree dating calibration and Bayesian priors*

4 The nodes used to calibrate the ML phylogeny (fig. S1) are identified in fig. S2 and the  
5 parameters used in the calibration are specified in table S2 [1].

6 *CAFE model fitting under alternative topology*

7 Models of gene family evolution were fitted in CAFE using a phylogeny with a  
8 paraphyletic Paraneoptera, similar to the topology in [1]. The best models were selected  
9 using likelihood-ratio tests, fitting the null distributions to  $\chi^2$  distributions with degrees of  
10 freedom equal to the difference in number of parameters between the two models.

11

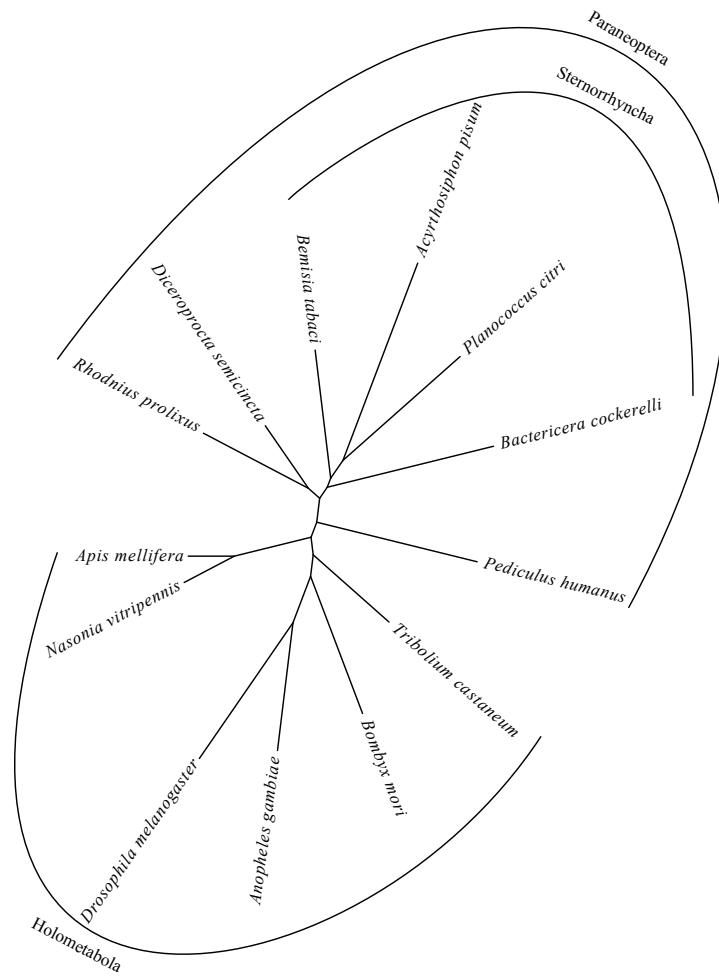

12  
13

Figure S1: Unrooted ML phylogeny inferred in RAxML.

0.2

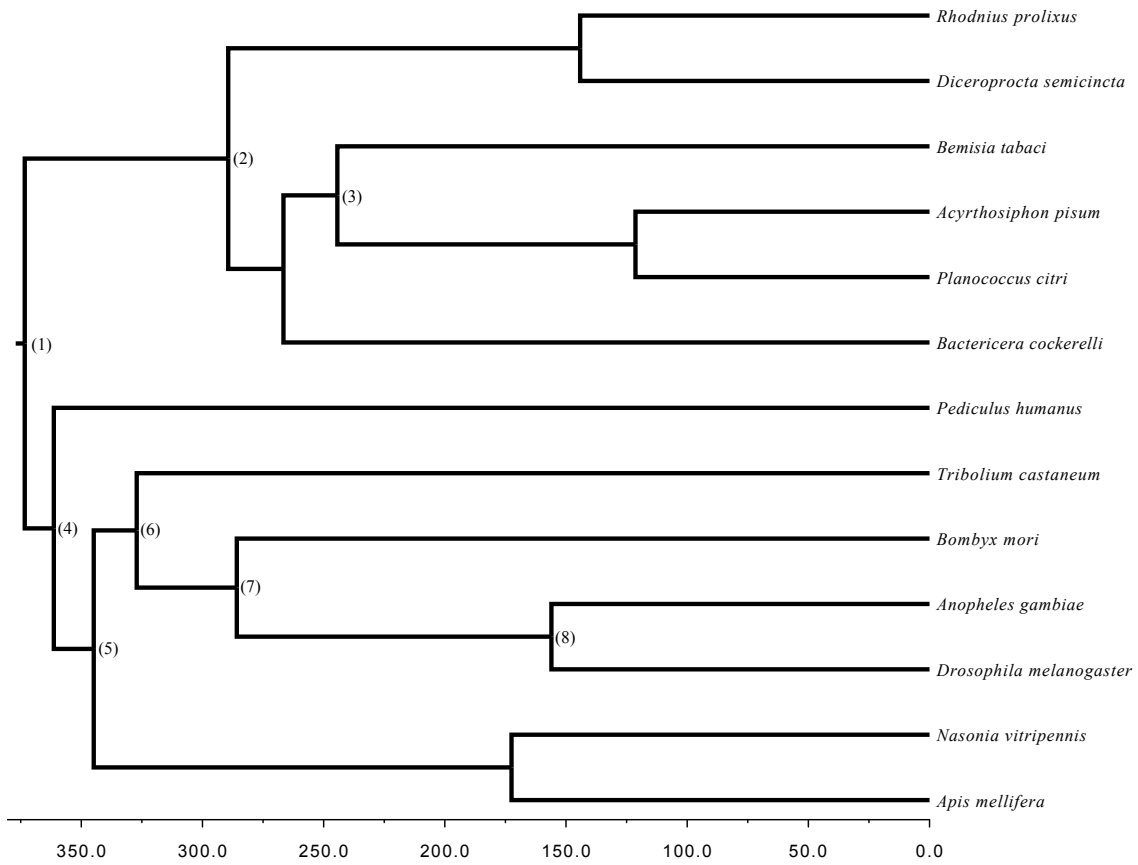

14

15 Fig. S2: Calibrated phylogeny used as starting point of Bayesian inference. The labeled

16 nodes refer to the calibration point in table S2 used for the time calibration.

17

## References

- 18 1. Misof B, Liu S, Meusemann K, Peters RS, Donath A, Mayer C, Frandsen PB, Ware J,  
19 Flouri T, Beutel RG, Niehuis O, Petersen M, Izquierdo-Carrasco F, Wappler T, Rust J,  
20 Aberer AJ, Aspöck U, Aspöck H, Bartel D, Blanke A, Berger S, Böhm A, Buckley TR,  
21 Calcott B, Chen J, Friedrich F, Fukui M, Fujita M, Greve C, Grobe P, et al.:  
22 **Phylogenomics resolves the timing and pattern of insect evolution.** *Science* 2014,  
23 **346:763–768.**

24

25 Table S1: Taxonomy of the species used in the phylogenetic inference.

| Species                        | Superfamily    | Sub-order       | Order        | Super order  |
|--------------------------------|----------------|-----------------|--------------|--------------|
| <i>Acyrtosiphon pisum</i>      | Aphidoidea     |                 |              |              |
| <i>Planococcus citri</i>       | Coccoidea      |                 |              |              |
| <i>Bemisia tabaci</i>          | Aleyrodidea    | Sternorrhyncha  |              |              |
| <i>Bactericera cockerelli</i>  | Psylloidea     |                 | Hemiptera    | Paraneoptera |
| <i>Rhodnius prolixus</i>       | Reduvidoidea   | Heteroptera     |              |              |
| <i>Diceroprocta semicincta</i> | Cicadoidea     | Auchenorrhyncha |              |              |
| <i>Pediculus humanus</i>       |                | Anoplura        | Phthiraptera |              |
| <i>Nasonia vitripennis</i>     | Chalcidoidea   |                 |              |              |
| <i>Apis mellifera</i>          | Apoidea        | Apocrita        | Hymenoptera  |              |
| <i>Tribolium castaneum</i>     | Tenebrionoidea | Polyphaga       | Coleoptera   |              |
| <i>Bombyx mori</i>             | Bombycoidea    | Glossata        | Lepidoptera  | Holometabola |
| <i>Drosophila melanogaster</i> | Ephydroidea    | Brachycera      |              |              |
| <i>Anopheles gambiae</i>       | Culicoidea     | Nematocera      | Diptera      |              |

27 Table S2: Nodes and divergence times used to calibrate the ML phylogeny. Node number refers  
28 to the labels in fig. S2. All dates in million years before present.

| Node | Divergence lower bound | Divergence upper bound | Calibrated value |
|------|------------------------|------------------------|------------------|
| 1    | 346                    | 401                    | 373.33           |
| 2    | 233                    | 346                    | 289.38           |
| 3    | 182                    | 307                    | 244.34           |
| 4    | 334                    | 390                    | 361.32           |
| 5    | 318                    | 372                    | 344.87           |
| 6    | 301                    | 353                    | 327.13           |
| 7    | 244                    | 329                    | 285.83           |
| 8    | 107                    | 207                    | 156.48           |

29

30

31 Table S3: Akaike Information Criterion (AIC) of models in the DupliPHY-ML algorithm.

|     | Model       | # Parameters | ML    | AIC   |
|-----|-------------|--------------|-------|-------|
| APC | Parsimony   | 1            | 24.13 | 50.26 |
|     | Parsimony+G | 2            | 24.32 | 52.65 |
|     | BDO         | 2            | 23.88 | 51.76 |
|     | BDI         | 3            | 23.68 | 53.37 |
|     | BDI+G       | 4            | 23.88 | 55.76 |
|     | BDIE        | 4            | 23.68 | 55.36 |
|     | BDIE+G      | 5            | 23.88 | 57.75 |
| AAP | Parsimony   | 1            | 24.46 | 50.92 |
|     | Parsimony+G | 2            | 24.66 | 53.31 |
|     | BDO         | 2            | 23.95 | 51.90 |
|     | BDI         | 3            | 23.75 | 53.50 |
|     | BDI+G       | 4            | 23.95 | 55.90 |
|     | BDIE        | 4            | 23.74 | 55.48 |
|     | BDIE+G      | 5            | 25.13 | 60.26 |

32

33

34

35

36

37

38

39 Table S4: Results of a Likelihood-ratio test comparing models with a global  $\lambda$  rate of gene duplication to models with a rate shift in  
 40 Sternorrhyncha. The models were fitted using a phylogeny with a paraphyletic Paraneoptera (fig. S2).  $\lambda$  represents the probability of  
 41 gene duplication/loss per gene per million years.

|      | Model              | $\lambda_{\text{Background}}$<br>$\times 10^3$ | $\lambda_{\text{Sternorrhyncha X}}$<br>$10^3$ | Fold increase | -ML   | #<br>Parameters | Likelihood<br>ratio | <i>p</i> -value |
|------|--------------------|------------------------------------------------|-----------------------------------------------|---------------|-------|-----------------|---------------------|-----------------|
| APC  | Single $\lambda$   | 1.419                                          | -                                             | -             | 35.27 | 1               | 2.845               | 0.097           |
|      | Multiple $\lambda$ | 0.7235                                         | 3.4201                                        | 4.73          | 33.85 | 2               |                     |                 |
| AAAP | Single $\lambda$   | 1.3793                                         | -                                             | -             | 38.41 | 1               | 6.039               | 0.018           |
|      | Multiple $\lambda$ | 0.3774                                         | 3.7511                                        | 9.94          | 35.39 | 2               |                     |                 |



43 Table S5: Results of the Likelihood-ratio test comparing models differentiating  $\lambda$  and  $\mu$  to models with equal birth-death parameters.  
 44 For APC, the estimated parameters are global across the phylogeny. For AAAP, the parameters were rates were allowed to shift in  
 45 sternorrhynchan species. The models were fitted using a phylogeny with a paraphyletic Paraneoptera (fig. S2).  $\lambda$  represents the  
 46 probability of gene duplication/loss (Single/Multiple  $\lambda$ ), or gene duplication only (Single/Multiple  $\lambda + \mu$ ) per gene per million years.  $\mu$   
 47 represents the probability of gene loss per gene per million years.

|      | Model                    | $\lambda_{\text{Background}} \times 10^3$ | $\lambda_{\text{Sternorrhyncha}} \times 10^3$ | $\mu_{\text{Background}} \times 10^3$ | $\mu_{\text{Sternorrhyncha}} \times 10^3$ | -ML   | # parameters | Likelihood ratio | <i>p</i> -value |
|------|--------------------------|-------------------------------------------|-----------------------------------------------|---------------------------------------|-------------------------------------------|-------|--------------|------------------|-----------------|
| APC  | Single $\lambda$         | 1.419                                     | -                                             | -                                     | -                                         | 35.27 | 1            | 0.03             | 0.855           |
|      | Single $\lambda + \mu$   | 1.3923                                    | -                                             | 1.4517                                | -                                         | 35.25 | 2            |                  |                 |
| AAAP | Multiple $\lambda$       | 0.3774                                    | 3.7511                                        | -                                     | -                                         | 35.39 | 2            | 8.57             | 0.011           |
|      | Multiple $\lambda + \mu$ | $1.14 \times 10^{-10}$                    | 3.01                                          | 0.5096                                | 1.8965                                    | 31.11 | 4            |                  |                 |
